# Supplementary material for: Construction of luminescent three-dimensional Ln(iii)–Zn(ii) heterometallic coordination polymers based on 2-pyridyl imidazole dicarboxylate
Source: Royal Society of Chemistry journal article supplement (doi:10.1039/c2ce25803j), 2012-01-01
Supplement: c2ce25803j.pdf [file c2ce25803j.pdf]

## Construction of Luminescent Three-Dimensional Ln(III)-Zn(II) Heterometallic Coordination Polymers based on 2-Pyridyl Imidazole Dicarboxylate

Song-Liang Cai,<sup>†</sup> Sheng-Run Zheng,<sup>\*†</sup> Zhen-Zhen Wen,<sup>†</sup> Jun Fan,<sup>†</sup> Wei-Guang Zhang<sup>\*†</sup>

*School of Chemistry and Environment, South China Normal University, Guangzhou, 510006, P. R. China. E-mail: [zhengshengrun@gmail.com](mailto:zhengshengrun@gmail.com); [wgzhang@scnu.edu.cn](mailto:wgzhang@scnu.edu.cn); Fax: +86-20-39347768*

### Supporting information

**Table S1** Selected bond lengths [Å] and angles [°] for the compounds.<sup>a</sup>

| Complex 1           |            |                      |           |
|---------------------|------------|----------------------|-----------|
| Sm(1)-O(2)          | 2.362(6)   | Zn(1)-O(1)           | 2.034(7)  |
| Sm(1)-O(2)#1        | 2.362(6)   | Zn(1)-O(4)#4         | 2.052(7)  |
| Sm(1)-O(2)#2        | 2.362(6)   | Zn(1)-N(2)#4         | 2.106(7)  |
| Sm(1)-O(2)#3        | 2.362(6)   | Zn(1)-N(1)           | 2.126(7)  |
| Sm(1)-O(3)#1        | 2.433(6)   | Zn(2)-N(3)           | 2.086(9)  |
| Sm(1)-O(3)          | 2.433(6)   | Zn(2)-N(3)#5         | 2.086(9)  |
| Sm(1)-O(3)#2        | 2.433(6)   | Zn(2)-O(1W)          | 2.153(11) |
| Sm(1)-O(3)#3        | 2.433(6)   | Zn(2)-O(2W)#5        | 2.180(8)  |
| Zn(1)-Cl(1)         | 2.0120(18) | Zn(2)-O(2W)          | 2.180(8)  |
| O(2)-Sm(1)-O(2)#1   | 106.9(4)   | O(2)-Sm(1)-O(3)#2    | 79.6(2)   |
| O(2)-Sm(1)-O(2)#2   | 82.1(4)    | O(2)#1-Sm(1)-O(3)#2  | 138.5(2)  |
| O(2)#1-Sm(1)-O(2)#2 | 147.9(3)   | O(2)#2-Sm(1)-O(3)#2  | 72.9(2)   |
| O(2)-Sm(1)-O(2)#3   | 147.9(3)   | O(2)#3-Sm(1)-O(3)#2  | 74.1(3)   |
| O(2)#1-Sm(1)-O(2)#3 | 82.1(4)    | O(3)#1-Sm(1)-O(3)#2  | 69.7(3)   |
| O(2)#2-Sm(1)-O(2)#3 | 106.9(4)   | O(3)-Sm(1)-O(3)#2    | 143.3(3)  |
| O(2)-Sm(1)-O(3)#1   | 74.1(3)    | O(2)-Sm(1)-O(3)#3    | 138.5(2)  |
| O(2)#1-Sm(1)-O(3)#1 | 72.9(2)    | O(2)#1-Sm(1)-O(3)#3  | 79.6(2)   |
| O(2)#2-Sm(1)-O(3)#1 | 138.5(2)   | O(2)#2-Sm(1)-O(3)#3  | 74.1(3)   |
| O(2)#3-Sm(1)-O(3)#1 | 79.6(2)    | O(2)#3-Sm(1)-O(3)#3  | 72.9(2)   |
| O(2)-Sm(1)-O(3)     | 72.9(2)    | O(3)#1-Sm(1)-O(3)#3  | 143.3(3)  |
| O(2)#1-Sm(1)-O(3)   | 74.1(3)    | O(3)-Sm(1)-O(3)#3    | 69.7(3)   |
| O(2)#2-Sm(1)-O(3)   | 79.6(2)    | O(3)#2-Sm(1)-O(3)#3  | 123.1(3)  |
| O(2)#3-Sm(1)-O(3)   | 138.5(2)   | Cl(1)-Zn(1)-O(1)     | 125.9(4)  |
| O(3)#1-Sm(1)-O(3)   | 123.1(3)   | Cl(1)-Zn(1)-O(4)#4   | 114.0(4)  |
| O(1)-Zn(1)-O(4)#4   | 119.8(3)   | N(3)-Zn(2)-O(1W)     | 120.1(3)  |
| Cl(1)-Zn(1)-N(2)#4  | 101.0(2)   | N(3)#5-Zn(2)-O(1W)   | 120.1(3)  |
| O(1)-Zn(1)-N(2)#4   | 93.1(3)    | N(3)-Zn(2)-O(2W)#5   | 89.6(4)   |
| O(4)#4-Zn(1)-N(2)#4 | 80.0(3)    | N(3)#5-Zn(2)-O(2W)#5 | 92.2(4)   |
| Cl(1)-Zn(1)-N(1)    | 91.8(2)    | O(1W)-Zn(2)-O(2W)#5  | 88.2(3)   |
| O(1)-Zn(1)-N(1)     | 80.2(3)    | N(3)-Zn(2)-O(2W)     | 92.2(4)   |
| O(4)#4-Zn(1)-N(1)   | 93.8(3)    | N(3)#5-Zn(2)-O(2W)   | 89.6(4)   |
| N(2)#4-Zn(1)-N(1)   | 167.1(3)   | O(1W)-Zn(2)-O(2W)    | 88.2(3)   |
| N(3)-Zn(2)-N(3)#5   | 119.8(5)   | O(2W)#5-Zn(2)-O(2W)  | 176.5(6)  |
| Complex 2           |            |                      |           |

|                     |            |                      |            |
|---------------------|------------|----------------------|------------|
| Eu(1)-O(2)#1        | 2.361(4)   | Zn(1)-O(1)#4         | 2.029(5)   |
| Eu(1)-O(2)#2        | 2.361(4)   | Zn(1)-O(4)           | 2.042(5)   |
| Eu(1)-O(2)          | 2.361(4)   | Zn(1)-N(2)           | 2.122(6)   |
| Eu(1)-O(2)#3        | 2.361(4)   | Zn(1)-N(1)#4         | 2.133(6)   |
| Eu(1)-O(3)#1        | 2.440(4)   | Zn(2)-N(3)           | 2.072(6)   |
| Eu(1)-O(3)#3        | 2.440(4)   | Zn(2)-N(3)#5         | 2.072(6)   |
| Eu(1)-O(3)          | 2.440(4)   | Zn(2)-O(1W)          | 2.133(9)   |
| Eu(1)-O(3)#2        | 2.440(4)   | Zn(2)-O(2W)#5        | 2.189(7)   |
| Zn(1)-Cl(1)         | 1.9818(10) | Zn(2)-O(2W)          | 2.189(7)   |
| O(2)#1-Eu(1)-O(2)#2 | 105.8(2)   | O(2)#1-Eu(1)-O(3)    | 138.55(17) |
| O(2)#1-Eu(1)-O(2)   | 147.7(2)   | O(2)#2-Eu(1)-O(3)    | 79.44(17)  |
| O(2)#2-Eu(1)-O(2)   | 83.2(3)    | O(2)-Eu(1)-O(3)      | 73.09(16)  |
| O(2)#1-Eu(1)-O(2)#3 | 83.2(3)    | O(2)#3-Eu(1)-O(3)    | 74.01(18)  |
| O(2)#2-Eu(1)-O(2)#3 | 147.7(2)   | O(3)#1-Eu(1)-O(3)    | 69.0(2)    |
| O(2)-Eu(1)-O(2)#3   | 105.8(2)   | O(3)#3-Eu(1)-O(3)    | 124.0(2)   |
| O(2)#1-Eu(1)-O(3)#1 | 73.09(16)  | O(2)#1-Eu(1)-O(3)#2  | 74.01(18)  |
| O(2)#2-Eu(1)-O(3)#1 | 74.01(18)  | O(2)#2-Eu(1)-O(3)#2  | 73.09(16)  |
| O(2)-Eu(1)-O(3)#1   | 138.55(17) | O(2)-Eu(1)-O(3)#2    | 79.44(17)  |
| O(2)#3-Eu(1)-O(3)#1 | 79.44(17)  | O(2)#3-Eu(1)-O(3)#2  | 138.55(17) |
| O(2)#1-Eu(1)-O(3)#3 | 79.44(17)  | O(3)#1-Eu(1)-O(3)#2  | 124.0(2)   |
| O(2)#2-Eu(1)-O(3)#3 | 138.55(17) | O(3)#3-Eu(1)-O(3)#2  | 69.0(2)    |
| O(2)-Eu(1)-O(3)#3   | 74.01(18)  | O(3)-Eu(1)-O(3)#2    | 143.0(2)   |
| O(2)#3-Eu(1)-O(3)#3 | 73.09(16)  | Cl(1)-Zn(1)-O(1)#4   | 124.2(3)   |
| O(3)#1-Eu(1)-O(3)#3 | 143.0(2)   | Cl(1)-Zn(1)-O(4)     | 117.2(3)   |
| O(1)#4-Zn(1)-O(4)   | 118.3(2)   | N(3)-Zn(2)-O(1W)     | 121.42(17) |
| Cl(1)-Zn(1)-N(2)    | 101.17(16) | N(3)#5-Zn(2)-O(1W)   | 121.42(17) |
| O(1)#4-Zn(1)-N(2)   | 93.1(2)    | N(3)-Zn(2)-O(2W)#5   | 88.3(3)    |
| O(4)-Zn(1)-N(2)     | 80.10(19)  | N(3)#5-Zn(2)-O(2W)#5 | 92.8(3)    |
| Cl(1)-Zn(1)-N(1)#4  | 91.83(17)  | O(1W)-Zn(2)-O(2W)#5  | 89.0(2)    |
| O(1)#4-Zn(1)-N(1)#4 | 79.7(2)    | N(3)-Zn(2)-O(2W)     | 92.8(3)    |
| O(4)-Zn(1)-N(1)#4   | 93.7(2)    | N(3)#5-Zn(2)-O(2W)   | 88.3(3)    |
| N(2)-Zn(1)-N(1)#4   | 167.0(2)   | O(1W)-Zn(2)-O(2W)    | 89.0(2)    |
| N(3)-Zn(2)-N(3)#5   | 117.2(3)   | O(2W)#5-Zn(2)-O(2W)  | 178.0(4)   |

### Complex 3

|                     |           |                   |            |
|---------------------|-----------|-------------------|------------|
| Tb(1)-O(2)#1        | 2.335(5)  | Zn(1)-O(1)#4      | 2.040(5)   |
| Tb(1)-O(2)#2        | 2.335(5)  | Zn(1)-O(4)        | 2.053(5)   |
| Tb(1)-O(2)          | 2.335(5)  | Zn(1)-N(2)        | 2.115(6)   |
| Tb(1)-O(2)#3        | 2.335(5)  | Zn(1)-N(1)#4      | 2.134(6)   |
| Tb(1)-O(3)#1        | 2.425(5)  | Zn(2)-N(3)        | 2.072(6)   |
| Tb(1)-O(3)#3        | 2.425(5)  | Zn(2)-N(3)#5      | 2.072(6)   |
| Tb(1)-O(3)          | 2.425(5)  | Zn(2)-O(1W)       | 2.136(8)   |
| Tb(1)-O(3)#2        | 2.425(5)  | Zn(2)-O(2W)#5     | 2.165(8)   |
| Zn(1)-Cl(1)         | 1.9669(9) | Zn(2)-O(2W)       | 2.165(8)   |
| O(2)#1-Tb(1)-O(2)#2 | 105.8(3)  | O(2)#1-Tb(1)-O(3) | 138.35(17) |

|                     |            |                      |            |
|---------------------|------------|----------------------|------------|
| O(2)#1-Tb(1)-O(2)   | 147.8(2)   | O(2)#2-Tb(1)-O(3)    | 79.55(17)  |
| O(2)#2-Tb(1)-O(2)   | 83.2(3)    | O(2)-Tb(1)-O(3)      | 73.17(16)  |
| O(2)#1-Tb(1)-O(2)#3 | 83.2(3)    | O(2)#3-Tb(1)-O(3)    | 73.97(18)  |
| O(2)#2-Tb(1)-O(2)#3 | 147.8(2)   | O(3)#1-Tb(1)-O(3)    | 68.8(2)    |
| O(2)-Tb(1)-O(2)#3   | 105.8(3)   | O(3)#3-Tb(1)-O(3)    | 124.1(2)   |
| O(2)#1-Tb(1)-O(3)#1 | 73.17(16)  | O(2)#1-Tb(1)-O(3)#2  | 73.97(18)  |
| O(2)#2-Tb(1)-O(3)#1 | 73.97(18)  | O(2)#2-Tb(1)-O(3)#2  | 73.17(16)  |
| O(2)-Tb(1)-O(3)#1   | 138.35(17) | O(2)-Tb(1)-O(3)#2    | 79.55(17)  |
| O(2)#3-Tb(1)-O(3)#1 | 79.55(17)  | O(2)#3-Tb(1)-O(3)#2  | 138.35(17) |
| O(2)#1-Tb(1)-O(3)#3 | 79.55(17)  | O(3)#1-Tb(1)-O(3)#2  | 124.1(2)   |
| O(2)#2-Tb(1)-O(3)#3 | 138.35(17) | O(3)#3-Tb(1)-O(3)#2  | 68.8(2)    |
| O(2)-Tb(1)-O(3)#3   | 73.97(18)  | O(3)-Tb(1)-O(3)#2    | 143.3(2)   |
| O(2)#3-Tb(1)-O(3)#3 | 73.17(16)  | Cl(1)-Zn(1)-O(1)#4   | 122.8(3)   |
| O(3)#1-Tb(1)-O(3)#3 | 143.3(2)   | Cl(1)-Zn(1)-O(4)     | 118.1(3)   |
| O(1)#4-Zn(1)-O(4)   | 118.9(2)   | N(3)-Zn(2)-O(1W)     | 121.51(19) |
| Cl(1)-Zn(1)-N(2)    | 101.50(16) | N(3)#5-Zn(2)-O(1W)   | 121.51(19) |
| O(1)#4-Zn(1)-N(2)   | 92.8(2)    | N(3)-Zn(2)-O(2W)#5   | 88.0(3)    |
| O(4)-Zn(1)-N(2)     | 80.0(2)    | N(3)#5-Zn(2)-O(2W)#5 | 92.8(3)    |
| Cl(1)-Zn(1)-N(1)#4  | 91.48(17)  | O(1W)-Zn(2)-O(2W)#5  | 89.2(2)    |
| O(1)#4-Zn(1)-N(1)#4 | 79.7(2)    | N(3)-Zn(2)-O(2W)     | 92.8(3)    |
| O(4)-Zn(1)-N(1)#4   | 94.2(2)    | N(3)#5-Zn(2)-O(2W)   | 88.0(3)    |
| N(2)-Zn(1)-N(1)#4   | 167.0(2)   | O(1W)-Zn(2)-O(2W)    | 89.2(2)    |
| N(3)-Zn(2)-N(3)#5   | 117.0(4)   | O(2W)#5-Zn(2)-O(2W)  | 178.3(4)   |
| <b>Complex 4</b>    |            |                      |            |
| Tb(1)-O(3)#1        | 2.233(3)   | Tb(1)-O(2)           | 2.609(3)   |
| Tb(1)-O(7)#2        | 2.330(3)   | Zn(1)-O(4)#3         | 2.116(3)   |
| Tb(1)-O(5)          | 2.331(3)   | Zn(1)-N(1)           | 2.119(3)   |
| Tb(1)-O(2W)         | 2.364(3)   | Zn(1)-N(3)#4         | 2.125(3)   |
| Tb(1)-O(1W)         | 2.378(3)   | Zn(1)-O(3W)          | 2.126(3)   |
| Tb(1)-O(2)#1        | 2.393(3)   | Zn(1)-N(2)#3         | 2.128(3)   |
| Tb(1)-O(1)          | 2.454(3)   | Zn(1)-O(1)           | 2.283(3)   |
| O(3)#1-Tb(1)-O(7)#2 | 79.82(12)  | O(7)#2-Tb(1)-O(2)    | 134.77(10) |
| O(3)#1-Tb(1)-O(5)   | 85.63(12)  | O(5)-Tb(1)-O(2)      | 73.81(10)  |
| O(7)#2-Tb(1)-O(5)   | 146.05(11) | O(2W)-Tb(1)-O(2)     | 118.65(11) |
| O(3)#1-Tb(1)-O(2W)  | 88.23(12)  | O(1W)-Tb(1)-O(2)     | 69.72(10)  |
| O(7)#2-Tb(1)-O(2W)  | 74.81(12)  | O(2)#1-Tb(1)-O(2)    | 64.84(11)  |
| O(5)-Tb(1)-O(2W)    | 74.23(12)  | O(1)-Tb(1)-O(2)      | 51.19(9)   |
| O(3)#1-Tb(1)-O(1W)  | 114.39(12) | O(4)#3-Zn(1)-N(1)    | 90.23(12)  |
| O(7)#2-Tb(1)-O(1W)  | 72.15(11)  | O(4)#3-Zn(1)-N(3)#4  | 169.73(14) |
| O(5)-Tb(1)-O(1W)    | 141.53(11) | N(1)-Zn(1)-N(3)#4    | 90.96(13)  |
| O(2W)-Tb(1)-O(1W)   | 135.11(11) | O(4)#3-Zn(1)-O(3W)   | 92.23(13)  |
| O(3)#1-Tb(1)-O(2)#1 | 76.55(11)  | N(1)-Zn(1)-O(3W)     | 97.89(13)  |
| O(7)#2-Tb(1)-O(2)#1 | 125.31(11) | N(3)#4-Zn(1)-O(3W)   | 97.71(13)  |
| O(5)-Tb(1)-O(2)#1   | 79.77(11)  | O(4)#3-Zn(1)-N(2)#3  | 77.86(12)  |

|                    |            |                     |            |
|--------------------|------------|---------------------|------------|
| O(2W)-Tb(1)-O(2)#1 | 150.76(11) | N(1)-Zn(1)-N(2)#3   | 166.67(13) |
| O(1W)-Tb(1)-O(2)#1 | 74.12(10)  | N(3)#4-Zn(1)-N(2)#3 | 99.71(13)  |
| O(3)#1-Tb(1)-O(1)  | 165.79(11) | O(3W)-Zn(1)-N(2)#3  | 88.64(13)  |
| O(7)#2-Tb(1)-O(1)  | 97.50(11)  | O(4)#3-Zn(1)-O(1)   | 86.41(12)  |
| O(5)-Tb(1)-O(1)    | 89.19(11)  | N(1)-Zn(1)-O(1)     | 75.04(11)  |
| O(2W)-Tb(1)-O(1)   | 77.62(11)  | N(3)#4-Zn(1)-O(1)   | 84.04(13)  |
| O(1W)-Tb(1)-O(1)   | 77.49(11)  | O(3W)-Zn(1)-O(1)    | 172.78(11) |
| O(2)#1-Tb(1)-O(1)  | 115.53(9)  | N(2)#3-Zn(1)-O(1)   | 97.99(12)  |
| O(3)#1-Tb(1)-O(2)  | 138.61(10) |                     |            |

<sup>a</sup>Symmetry transformations used to generate equivalent atoms: #1  $-x + 3/4, -y + 3/4, z$ , #2  $x, -y + 3/4, -z + 3/4$ , #3  $-x + 3/4, y, -z + 3/4$ , #4  $x + 1/4, y + 1/4, -z + 1$ , #5  $-x + 1/4, -y + 5/4, z$ , #6  $x - 1/4, y - 1/4, -z + 1$ , #7  $-x - 1/4, -y + 3/4, z$ , #8  $-x + 3/2, -y + 1, -z + 3/2$  for complexes **1, 2 and 3**; #1  $-x + 1, -y + 1, -z + 2$ , #2  $-x + 1, y - 1/2, -z + 5/2$ , #3  $x, -y + 1/2, z + 1/2$ , #4  $-x, y + 1/2, -z + 3/2$  for complex **4**.

---

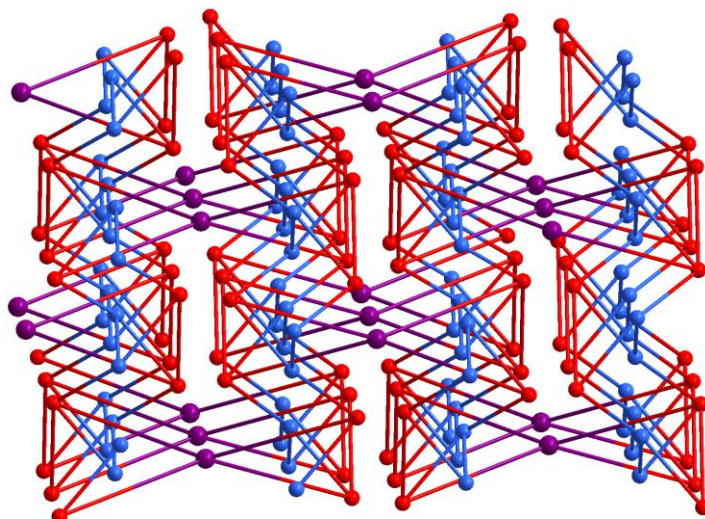

**Figure S1.** The (3,4)-connected network topology in complexes **1-3**.
